# Supplementary material for: Efficient induction of haploid plants in wheat by editing of TaMTL using an optimized Agrobacterium-mediated CRISPR system
Source: PubMed Central journal article supplement (PMC7031065; doi:10.1093/jxb/erz529), 2019-11-24
Supplement: erz529_suppl_supplementary_data.pdf [file erz529_suppl_supplementary_data.pdf]

# Editing *TaMTL* gene induces haploid plants efficiently by optimized *Agrobacterium*-mediated CRISPR system in wheat

Huiyun Liu,<sup>1, 2</sup> Ke Wang,<sup>1, \*</sup> Zimiao Jia,<sup>1</sup> Qiang Gong,<sup>1</sup> Zhishan Lin,<sup>1</sup> Lipu Du,<sup>1</sup> Xinwu Pei,<sup>2</sup> and Xingguo Ye,<sup>1, \*</sup>

<sup>1</sup>Institute of Crop Science, Chinese Academy of Agricultural Sciences, Beijing 100081, China

<sup>2</sup>Biotechnology Research Institute, Chinese Academy of Agricultural Sciences, Beijing 100081, China

\*Corresponding authors (wangke03@caas.cn, [yexingguo@caas.cn](mailto:yexingguo@caas.cn))

## Supplementary data:

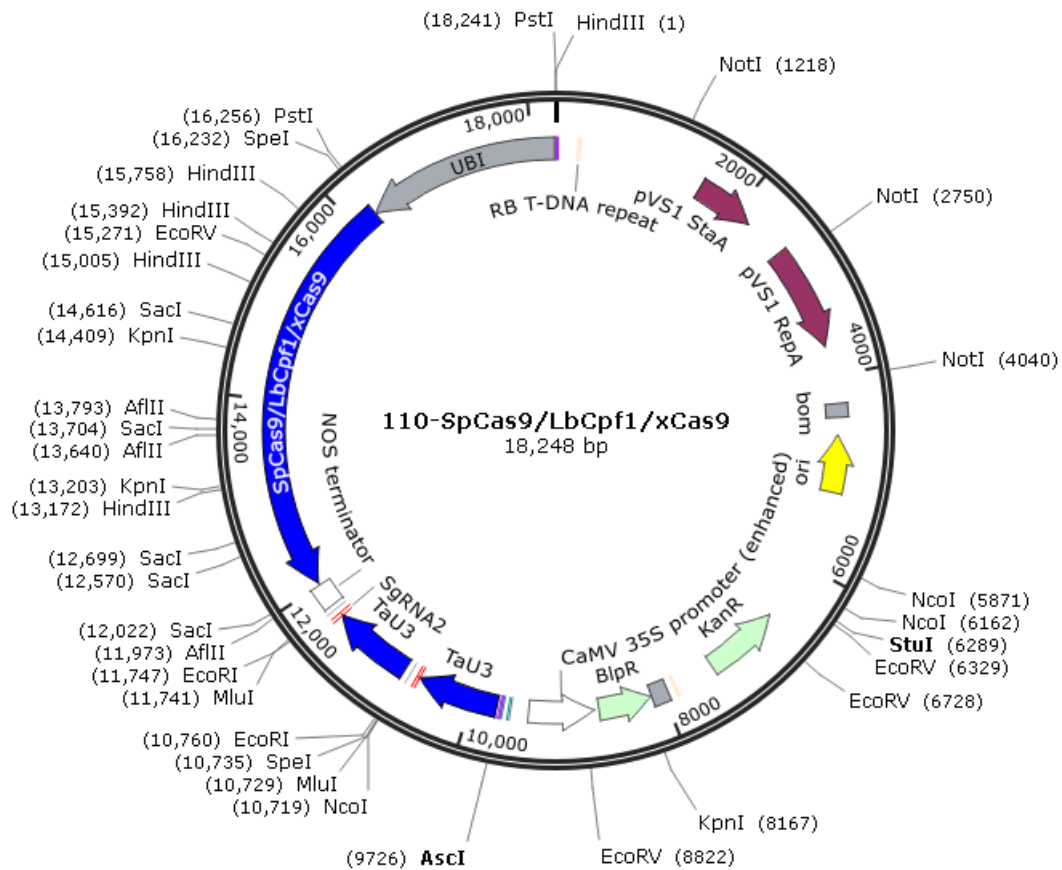

**Figure S1 Schematic map of vector pWMB110-SpCas9/LbCpf1/xCas9.** The vector is comprised of a SpCas9/LbCpf1/xCas9 expression cassette and the *phosphinothricin (bar)* gene, which was used for screening the transgenic wheat plants.

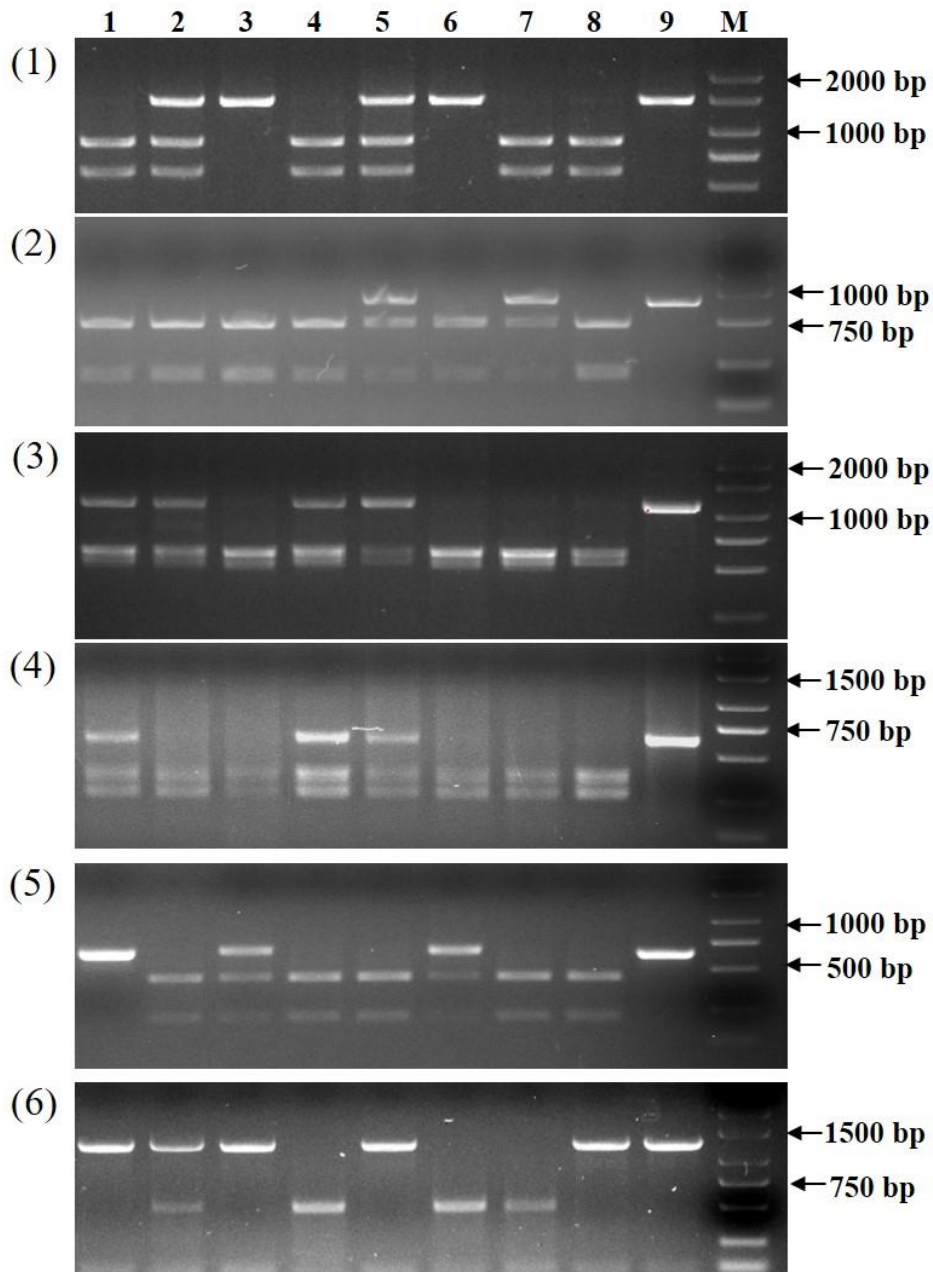

**Figure S2** Detection of mutations in the *GUS* ((1) and (6)), *TaMTL-179* (2), *TaMTL-471* (3), *TaWaxy-296* (4) and *TaWaxy-830* (5) genes. Lanes (1)1–(5)7: digested DNA of PCR products amplified from different transgenic plants; lanes (1)3, (1)6, and (5)1: biallelic mutants; lanes (1)2, (1)5, (2)5, (2)7, (3)1, (3)2, (3)4, (3)5, (4)1, (4)4, (4)5, 5(3) and 5(6): heterozygous mutants; lanes (1)1, (1)4, (1)7, (2)1, (2)2, (2)3, (2)4, (2)5, (2)6, (3)3, (3)6, (3)7, (4)2, (4)3, (4)6, (4)7, 5(2), 5(4), 5(5) and 5(7): non-mutant plants; lanes (1)8–(5)8: digested PCR products from marker-free line H29 containing *GUS* and wild-type plants Fielder and Ningchun4; lanes (1)9–(5)9: undigested PCR products from wheat line H29 and wild-type plants Fielder and Ningchun4; lanes (6)1–(6)8: PCR products of *GUS* from the transgenic plants; lanes (6)2, (6)4, (6)6, and (6)7: plants with a large fragment deletion; lane (6)9: PCR product of *GUS* from the wheat line H29; lane M: 2-kb marker ladder.

|                 |         |                                                             |        |
|-----------------|---------|-------------------------------------------------------------|--------|
| <i>TaMTL-4A</i> | WT      | CGGGC----//----AGGCCAAGCTGCAGGAGCTGGACGGGCCCGGGCGCGCGCCTG   |        |
| <i>TaMTL-4A</i> | QD33-43 | CGGGC----//----AGGCCAAGCT----AGGAGCTGGACGGGCCCGGGCGCGCGCCTG | -2 bp  |
| <i>TaMTL-4A</i> | QD33-46 | CGGGC-----AGGCCAAGCT----AGGAGCTGGACGGGCCCGGGCGCGCGCCTG      | -2 bp  |
| <i>TaMTL-4A</i> | QD33-52 | CGGGC----//----AGGCCAAGC-----GGAGCTGGACGGGCCCGGGCGCGCGCCTG  | -4 bp  |
| <i>TaMTL-4B</i> | WT      | GCCTTCCTCGAGGCCAAGCTGCAGGAGCTGGACGGGCCCGGGCGCGCGCCTG        |        |
| <i>TaMTL-4B</i> | QD33-14 | GCCTTCCTCGAGGCCAAGCTGCAGGAGCTGGACGGGCCCGGGCGCGCGCCTG        | +1 bp  |
| <i>TaMTL-4B</i> | QD33-20 | GCCTTCCTCGAGGCCAAGCT-----CGCGCGCCTG                         | -21 bp |
| <i>TaMTL-4B</i> | QD33-26 | GCCTTCCTCGAGGCCAAGCT-----AGCTGGACGGGCCCGGGCGCGCGCCTG        | -5 bp  |
| <i>TaMTL-4D</i> | WT      | GCCTTCCTCGAGGCCAAGCTGCAGGAGCTGGACGGGCCCGGGCGCGCGCCTG        |        |
| <i>TaMTL-4D</i> | QD33-14 | GCCTTCCTCGAGGCCAAGCT-----GGGCCGGCGCGCGCCTG                  | -13 bp |
| <i>TaMTL-4D</i> | QD33-20 | GCCTTCCTCGAGGCCAAGCT-----AGCTGGACGGGCCCGGGCGCGCGCCTG        | -5 bp  |
| <i>TaMTL-4D</i> | QD33-43 | GCCTTCC-----GGGGCTGGACGGGC-----CTG                          | -41 bp |

**Figure S3 InDel mutations of the *TaMTL* gene at the *TaMTL-179* site from edited T<sub>0</sub> transgenic plants.** WT: Fielder; QD33-14, QD33-20, QD33-26, QD33-43, QD33-46, and QD33-52: the *TaMTL*-edited plants.

|                 |         |                                                     |        |
|-----------------|---------|-----------------------------------------------------|--------|
| <i>TaMTL-4A</i> | WT      | AGGTGCGCGCTCGCCGCGGTGACCGCATCGCTGAGGCGGCCGAGGTACA   |        |
| <i>TaMTL-4A</i> | QD33-43 | AGGTGCGCGCTCGCCGCGGATGACCGCATCGCTGAGGCGGCCGAGGTACA  | +1 bp  |
| <i>TaMTL-4A</i> | QD33-46 | AGGTGCGCGCTCGCCGCGG-----CCGAGGTACA                  | -20 bp |
| <i>TaMTL-4A</i> | QD33-52 | AGGTGCGCGCTCGCCGCGG-----TACA                        | -26 bp |
| <i>TaMTL-4B</i> | WT      | AGGTGCGCGCTCGCCGCGGTGACCGCGTCGCTGAGGCGGCCGAGGTACA   |        |
| <i>TaMTL-4B</i> | QD33-14 | AGGTGCGCGCTCGCCGCGGT---ACCGCGTCGCTGAGGCGGCCGAGGTACA | -1 bp  |
| <i>TaMTL-4B</i> | QD33-20 | AGGTGCGCGCTCGCCGCGG-----GCGTCGCTGAGGCGGCCGAGGTACA   | -5 bp  |
| <i>TaMTL-4B</i> | QD33-46 | AGGTGCGCGCTCGCCGCGG-----CGCGTCGCTGAGGCGGCCGAGGTACA  | -4 bp  |
| <i>TaMTL-4D</i> | WT      | AGGTGCGCGCTGGCCGCGGTGACCGCGTCGCTGAGGCGGCCGAGGTACA   |        |
| <i>TaMTL-4D</i> | QD33-14 | AGGTGCGCGCTGGCCGCGGT-----GCGTCGCTGAGGCGGCCGAGGTACA  | -4 bp  |
| <i>TaMTL-4D</i> | QD33-20 | AGGTGCGCGCTGGCCGCGGT-----CGCGTCGCTGAGGCGGCCGAGGTACA | -3 bp  |
| <i>TaMTL-4D</i> | QD33-52 | AGGTGCGCGCTGGCCGCGG-----CCGAGGTACA                  | -20 bp |

**Figure S4 InDel mutations of the *TaMTL* gene at the *TaMTL-471* site from edited T<sub>0</sub> transgenic plants.** WT: Fielder; QD33-14, QD33-20, QD33-43, QD33-46, and QD33-52: the *TaMTL*-edited plants.

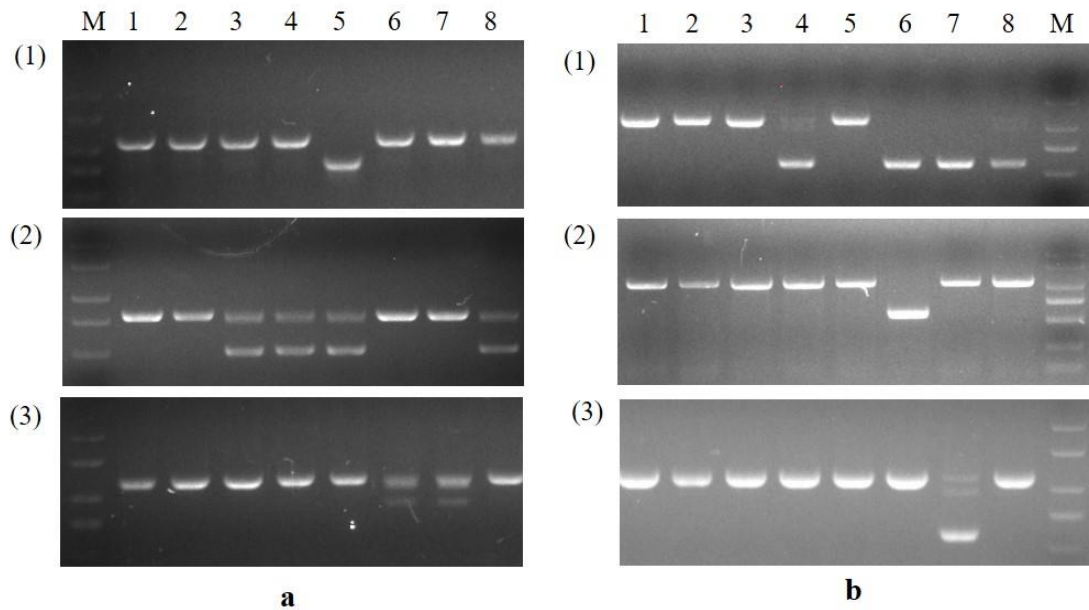

**Figure S5 Detection of large fragment deletions from different *TaMTL* and *TaWaxy* homologous genes.** (a) PCR products of the *TaMTL-4A* (1), *TaMTL-4B* (2) and *TaMTL-4D* (3) genes in transgenics (lanes 2–8) and *TaMTL* gene in wild-type Fielder (lane 1). Plants with a large fragment deletion in (1)5: *TaMTL-4A*; (2)3, (2)4 and (2)5: *TaMTL-4B*; and (3)6 and (3)7: *TaMTL-4D*. (b) PCR products of the *TaWaxy-4A* (1), *TaWaxy-7A* (2), and *TaWaxy-7D* (3) genes in transgenics (lanes 2–8) and *TaWaxy* gene in wild-type Ningchun4 (lane 1). Plants with a large fragment deletion in (1)4, (1)6, (1)7 and (1)8: *TaWaxy-4A*; (2)6: *TaWaxy-7A*; and (3)7: *TaWaxy-7D*. Lane M: 2-kb marker ladder.

TaMTL-4A GTGGTCGGCCAGCCGGTGGCGCCGGGGCAGCGGGTGACGGTGCTGACCATCGACGGGGGCGG  
 QD33-3 .....

TaMTL-4A TCGAGGCCAAGCTGCAGGAGCTGGACGGCCCCGGGCGCGCCTGGCCGACTACTTCGACTGC  
 QD33-3 .....C.GC.G-----..A.....A...CCTG.CAC.GC..A..ACA

TaMTL-4A GATCACCGCGCCCGGCAAGGACGGCCGCCGCTCT-TCGCCGCC-AGGGACGTCAACCGCTT  
 QD33-3 ...--..AT.T..ATG.GATGA.AT..TT..TG..C.....TTG.....A.ATGTAG.GCC

TaMTL-4A GAGAGCACGAACGATCTCATCTCATGGACATGG--ATCATGCGAGC--TGAA----CTGGTG  
 QD33-3 ..-..AG..GG..GC.GTCCT.GCC..G.GC..TG.....GCG.TGA...GGCCG.C....

TaMTL-4A CGCGCTCGCCGCG-----GTGACCGCATCGCTGAGGCGGCCGAGGTACAGCGGCA  
 QD33-3 .....C..GGC..TCCAGCTCCTGCA.....

TaMTL-4A ACGAGGCTGTGCGACGCGCTCACCGACGTCGTCATCCCCACCTTCGACGTCAAGCTTCTCCA  
 QD33-3 .....

**Figure S6** Sequence information of *TaMTL* gene at 4A chromosomal loci in the wild-type and the edited plant QD33-3.

TaMTL-4D CCAGCCGGTGGCGCCGGGGCAGCGGGTGACGGTGCTGACCATCGACGGGGGCGGCATCCGCG  
 QD33-3 .....

TaMTL-4D AAGCTGCAGGAGCTGGACGGGCCGGGCGCGCCTGGCCGACTACTTCGACTGCATCGCCGG  
 QD33-3 .....A.C.CG..CA.-----..C..A.-.T.....--..A...C--.A...ATA.ATA

TaMTL-4D CGCCCCGCAAGGACGGCTGCCCGCTCTTCGCCGCCAGGGACGTCAACCGCTTCTACCTCGAC  
 QD33-3 .ATGA.ATG..AT..TTC..G.T...AC.TTT..GG.AAGATGT.GGG..CAT.GT.GA.GT

TaMTL-4D ACGATCTCATCTCATG-GACATGGATCGTGCGAGCTGAACTGGTGAT--TGATGTATGTATT  
 QD33-3 C..TC..TGC.GGGC.C.GTGATC..G.C.GTGATGAGG.C.CC.G.GC..G..CCG.CGA.

TaMTL-4D T-----GACCGCTCGCTGAGGCGGCCGAGGTACAACGGCAAGTACCTGCACGGGA  
 QD33-3 CCAGCTCCTGCA.....

TaMTL-4D GCGCTACCGACGTGGTCATCCCCACCTTCGACGTCAAGCTTCTCCAGCCCATCATCTTCTC  
 QD33-3 .....

Figure S7 Sequence information of *TaMTL* gene at 4D chromosomal loci in the wild-type and the edited plant QD33-3.



|                  |          |                                                      |        |
|------------------|----------|------------------------------------------------------|--------|
| <i>TaWaxy-4A</i> | WT       | CCTGGAGCAAGACCGGCGGCCTCGGCGACGTCCTCGGGGGCCTCCCCCAG   |        |
| <i>TaWaxy-4A</i> | Xd350-3  | CCTGGAGCAAGACCGGCGGCCTCGGCG-----GGGCCTCCCCCAG        | -10 bp |
| <i>TaWaxy-4A</i> | Xd350-5  | CCTGGAGCAAGACCGGCGGCCTCGGCGACG-----GGGCCTCCCCCAG     | -6 bp  |
| <i>TaWaxy-4A</i> | Xd350-8  | CCTGGAGCAAGACCGGCGGCCTCGGCGACG--CCTCGGGGGCCTCCCCCAG  | -1 bp  |
| <i>TaWaxy-7A</i> | WT       | CCTGGAGCAAGACTGGCGGCCTCGGCGACGTCCTCGGGGGCCTCCCCGCCG  |        |
| <i>TaWaxy-7A</i> | Xd350-5  | CCTGGAGCAAGACTGGCGGCCTCGG-----GGGCCTCCCCGCCG         | -12 bp |
| <i>TaWaxy-7A</i> | Xd350-8  | CCTGGAGCAAGACTGGCGGCCTCGGCG-----GGCCTCCCCGCCG        | -11 bp |
| <i>TaWaxy-7D</i> | WT       | CCTGGAGCAAGACCGGCGGCCTCGGCGACGTCCTCGGGGGCCTCCCCCAG   |        |
| <i>TaWaxy-7D</i> | Xd350-3  | CCTGGAGCAAGACCGGCGGCCTCGGCGACGTCTCTCGGGGGCCTCCCCCAG  | +1 bp  |
| <i>TaWaxy-7D</i> | Xd350-8  | CCTGGAGCAAGACCGGCGGCCTCG-----CCTCGGGGGCCTCCCCCAG     | -7 bp  |
| <i>TaWaxy-7D</i> | Xd350-15 | CCTGGAGCAAGACCGGCGGCCTCGGCGA-----CCTCGGGGGCCTCCCCCAG | -3 bp  |

**Figure S8 InDel mutations of the *TaWaxy* gene at the *TaWaxy-296* site from edited To transgenic plants.** WT: Ningchun4; Xd350-3, Xd350-5, Xd350-8, and Xd350-15: the *TaWaxy*-edited plants.



|                  |          |                                                        |        |
|------------------|----------|--------------------------------------------------------|--------|
| <i>TaWaxy-4A</i> | WT       | TCCAGGTCCGGGGCAAGACCAAGGAGAAGATCTACGGGCCCCGATGCCGGCA   |        |
| <i>TaWaxy-4A</i> | Xd350-3  | TCCAGGTCCGGGGCAAGACCAAGGAG-----GCCCGATGCCGGCA          | -11 bp |
| <i>TaWaxy-4A</i> | Xd350-5  | TCCAGGTCCGGGGCAAGACCA-----TCTACGGGCCCCGATGCCGGCA       | -9 bp  |
| <i>TaWaxy-4A</i> | Xd350-8  | TCCAGGTCCGGGG-----GGCCCGATGCCGGCA                      | -23 bp |
| <i>TaWaxy-7A</i> | WT       | TCCAGGTCCGGGGCAAGACCAAGGAGAAGATCTATGGACCCGACGCCGGCA    |        |
| <i>TaWaxy-7A</i> | Xd350-5  | TCCAGGTCCGGGGCAAGAC-----A                              | -31 bp |
| <i>TaWaxy-7A</i> | Xd350-8  | TCCAGGTCCGGGGCAAGACCAAGGAGAAG---CTATGGACCCGACGCCGGCA   | -2 bp  |
| <i>TaWaxy-7D</i> | WT       | TCCAGGTCCGGGGCAAGACCAAGGAGAAGATCTACGGGCCCCGACGCCGGCA   |        |
| <i>TaWaxy-7D</i> | Xd350-3  | TCCAGGTCCGGGGCAAGACCAAGGAGAA-----CTACGGGCCCCGACGCCGGCA | -3 bp  |
| <i>TaWaxy-7D</i> | Xd350-8  | TCCAGGTCCGGGGCAA-----CGGGCCCCGACGCCGGCA                | -18 bp |
| <i>TaWaxy-7D</i> | Xd350-15 | TCCAGGTCCGGGGCAAGACCAAGGAG-----TCTACGGGCCCCGACGCCGGCA  | -4 bp  |

**Figure S9 InDel mutations of the *TaWaxy* gene at the *TaWaxy-830* site from edited To transgenic plants.** WT: Ningchun4; Xd350-3, Xd350-5, Xd350-8, and Xd350-15: the *TaWaxy*-edited plants.

TaWaxy-7A ACCGGCGGTGCCTCTCCATGGTGGTGC GCGCCACGGGCAGCGGCGGCATGAACCTCGTGTT  
 Xd350-15 .....

TaWaxy-7A CCTCGGCGACGTCCCTCGGGGGCCTCCCCGCCCATGGCCGTAAGCTTGCGCCACTGCCTT  
 Xd350-15 .....T--..TCTTGC...G.A.CTGGAAATT...C.AGCA.A.G.AAAGAC

TaWaxy-7A AACGGGTGCCGTGTCCGTGCAGGCCAACGGTCACCGGGTCATGGTCATCTCCCCGCGCTAC  
 Xd350-15 G...A.GAG.TA.CTT.-ATC.AT.G....CG.G..ATCGG.CAC.T....AG.AAGC..

TaWaxy-7A CGAGGTATATATCCGCCACATGAATTATCACAATTCACATGCTCCTGCACATTTCTGCAAG  
 Xd350-15 .AGT.G.AG..C.TCA.C.TCTCG.ACCTGTC.ACG..C.TGAT...GAGA.C.A..C..

TaWaxy-7A GACAGGTACGAGAGGGTGAGGTACTTCCACTGCTACAAGCGCGGGGTGGACCGCGTGTTCG  
 Xd350-15 TGTGATA.TTCAT.T.GCG.A..TA.A.CTC.GAGATGA...T...TC..AG.C..C.T

TaWaxy-7A CGCCGTCGATCGAT-CAAGCTAGCTCCTCGTCTGCTCAACCCGCATGGTGTGTTGATAATTT  
 Xd350-15 GA...T.GC.TGCA.GGA.AC.GCA.C...T..AA.GG.AG.....CTGCA.GA.GAAA

TaWaxy-7A CCGGGGCAAGACCAAGGAGAAGATCTATGGACCCGACGCGGCACCGACTACGAGGACAAC  
 Xd350-15 .G.C..GG..G..CCC...--.....

TaWaxy-7A GTGCCAGGATCCTCGACCTCAACAACAACCC  
 Xd350-15 .....

Figure S10 Sequence information of *TaWaxy* gene at 7A chromosomal loci in the wild-type and the edited plant Xd350-15.

**Table S1 Summary of the target sequences and mutation of the *GUS* gene in wheat T<sub>0</sub> plants obtained using the CRISPR/xCas9 editing system.**

| Target loci      | Promoter    | PAM-guide sequence (5'-3') | Transgenic plants | Mutant plants | Mutation rate % | Genotype |
|------------------|-------------|----------------------------|-------------------|---------------|-----------------|----------|
| <b>xCas9 3.7</b> |             |                            |                   |               |                 |          |
| GUS-1718         | <i>TaU3</i> | CCGCCAGGAATTTACGCGTGGA     | 71                | 0             | 0               | 71WT     |
| GUS-1159         | <i>TaU3</i> | ACACTCCTATCAACGGCCGTGGC    | 67                | 0             | 0               | 67WT     |
| GUS-1719         | <i>TaU3</i> | CGCCAGGAATTTACGCGTGGA      | 79                | 0             | 0               | 79WT     |
| GUS-1156         | <i>TaU3</i> | TCGTTAAAGCCACGGCCGTTGAT    | 79                | 0             | 0               | 79WT     |

**Table S2 PCR primers used for vector construction and editing identification in this study.**

| <b>Primer name</b> | <b>Primer sequence (5'→3')</b> | <b>Product size (bp)</b> | <b>Application</b>                                                                                       |
|--------------------|--------------------------------|--------------------------|----------------------------------------------------------------------------------------------------------|
| Cas9F              | TCAAGGCTCTTGTTTCGTCAGCA        | 1026                     | Detecting CRISPR/Cas9 or CRISPR/xCas9 construct                                                          |
| Cas9R              | TTGCCGCTCTGCTTATCCCTGA         |                          |                                                                                                          |
| Cpf1F              | ATCTCCCTCTTCAGAAAGA            | 802                      | Detecting CRISPR/Cpf1 construct                                                                          |
| Cpf1R              | AGATATCTTTACTTATCGTT           |                          |                                                                                                          |
| TaU3F              | GAATTCATCCTCACGTTCAACACC       | 857                      | Amplification the TaU3 promoter                                                                          |
| TaU3R              | CCTGTTCAAGTAAGGTCGTGCTTC       |                          |                                                                                                          |
| TaU6F              | GACCAAGCCCGTTATTCTGACAG        | 844                      | Amplification the TaU6 promoter                                                                          |
| TaU6R              | CGTGGCTCCATGTAGGACTTTC         |                          |                                                                                                          |
| OsU6aF             | CCAAGTGAACAGTATTCCTATA         | 816                      | Amplification the OsU6a promoter                                                                         |
| OsU6aR             | TTCCACACAACATACGAGCCG          |                          |                                                                                                          |
| F1                 | CGTTCATTCGTTCTAGATCGGAG        | 1320                     | PCR/RE detection for <i>GUS-788</i> (Eco105 I),<br><i>GUS-789</i> (Eco105 I), and <i>GUS-118</i> (Dra I) |
| R1                 | ATCCACGACCGACACTTTCACG         |                          |                                                                                                          |
| F2                 | CAAGGAAATCCGCAACCATATC         | 996                      | PCR/RE detection for <i>GUS-1156</i> (Eco52 I),<br><i>GUS-1159</i> (Eco52 I),                            |
| R2                 | TCAAACGTCCGAATCTTCTCCC         |                          |                                                                                                          |
| F3                 | GAACTCGACCCACAGAAGCGT          | 652                      | PCR/RE detection for <i>GUS-1718</i> (Mlu I),                                                            |

---

|               |                           |      |                                                      |
|---------------|---------------------------|------|------------------------------------------------------|
| R3            | TGTATAATTGCGGGACTCTAATC   |      | <i>GUS-1719</i> (Mlu I), and <i>GUS-2046</i> (Nhe I) |
| F4            | CTAGCAAACCCACCAATTAC      | 553  | PCR/RE detection for <i>TaMTL4A-179</i> (Pst I),     |
| R4            | GATCCAAGTATAAAATTAGCATAT  |      | and <i>TaMTL4A-471</i> (Eco91 II)                    |
| F5            | TTCAATCGATGGCAAGCTACTGGG  | 781  | PCR/RE detection for <i>TaMTL4B-179</i> (Pst I),     |
| R5            | CGTCATCGCCACCATCGTCTGC    |      | and <i>TaMTL4B-471</i> (Eco91 II)                    |
| F6            | GTCAACCGAGGTGCCGTCAGTTTG  | 903  | PCR/RE detection for <i>TaMTL4D-179</i> (Pst I),     |
| R6            | CGTCATCGCCACCATCGTCTGC    |      | and <i>TaMTL4D-471</i> (Eco91 II)                    |
| F7            | CCCCGAAGCAACAAAGCCGGAAAG  | 1167 | PCR/RE detection for <i>TaWaxy4A-296</i> (Zra I),    |
| R7            | TGCAGAACGCTACCTGGACATG    |      | and <i>TaWaxy4A-830</i> (Bgl II)                     |
| F8            | GAAACCGCACCGATTTCGACCGGCG | 760  | PCR/RE detection for <i>TaWaxy7A-296</i> (Zra I),    |
| R8            | AGTTGTTCTTGATCTTACCGTAGG  |      | and <i>TaWaxy7A-830</i> (Bgl II)                     |
| F9            | GTGCCTCTCCATGGTGGTGCGCG   | 1041 | PCR/RE detection for <i>TaWaxy7D-296</i> (Zra I),    |
| R9            | TGAACCGCAA AATTGATATGCCTG |      | and <i>TaWaxy7D-830</i> (Bgl II)                     |
| <i>TaADPF</i> | GCTCTCCAACAACATTGCCAAC    | 201  | Quantification of endogenous gene <i>TaADP</i>       |
| <i>TaADPR</i> | GCTTCTGCCTGTCACATACGC     |      |                                                      |
| <i>MTL4AF</i> | TCATCACCGCCATGATCACCGCG   | 161  | Quantification of <i>MTL4A</i> RNA                   |
| <i>MTL4AR</i> | ATCTTGCCGTGCAGGTA CTTGCC  |      |                                                      |

---

---

|               |                          |     |                                    |
|---------------|--------------------------|-----|------------------------------------|
| <i>MTL4BF</i> | ACGTCAACCGCTTCTACCTCGACA | 129 | Quantification of <i>MTL4B</i> RNA |
| <i>MTL4BR</i> | CTCGCCGAGCATGCTCCTGATCTT |     |                                    |
| <i>MTL4DF</i> | CCCATCATCTTCTCCACATACGAC | 134 | Quantification of <i>MTL4D</i> RNA |
| <i>MTL4DR</i> | ATGAGGTTGTACTCGCGCTCCTTG |     |                                    |

---

**Table S3 Off-target detection using designed sgRNA for *GUS*, *TaMTL*, and *TaWaxy* genes.**

| Target gene               | Genomic location                          | Off-target region*                              | Primers sequence (5' to 3')                                   | Mutations |
|---------------------------|-------------------------------------------|-------------------------------------------------|---------------------------------------------------------------|-----------|
| <i>GUS</i> -Off-target1   | Chromosome 1B:<br>667,829,586-667,829,602 | ACGTACGTCGAGGACA <b>CACA</b> <b>CGG</b>         | F: 5'-TGATTAGCACTAATCAATGT-3'<br>R: 5'-TAGTAGTAGTAAATGGAGT-3' | No        |
| <i>GUS</i> -Off-target2   | Chromosome 4A:<br>420,031,185-420,031,205 | <b>TTGCTAC</b> AGCTTTGATCTTTCTTTAA              | F: 5'-TGCTGGAATAGTGAAGC-3'<br>R: 5'-AATTTAAGGGTAAGAGA-3'      | No        |
| <i>GUS</i> -Off-target3   | Chromosome 7B:<br>673,667,427-673,667,447 | <b>TTGCTAC</b> AGCTTTGATCTTTCTTTAA              | F: 5'-ATACAGAAGCCAGCAGAT-3'<br>R: 5'-AATTTAAGGGTAAGAGAT-3'    | No        |
| <i>GUS</i> -Off-target4   | Chromosome 3B:<br>390,919,793-390,919,813 | <b>TTGCTAA</b> AGCTTTGATCTTTCTTTAA              | F: 5'-TTGCCGCCCTGCCATGGGA-3'<br>R: 5'-CTTGCCTGCATAGTGGGT-3'   | No        |
| <i>GUS</i> -Off-target5   | Chromosome 1B:<br>628,855,584-628,855,601 | <b>C</b> CTCCTATCAACGGCCGT <b>CC</b> <b>GGG</b> | F: 5'-AGCTCTCTGTTAGTGCGTG-3'<br>R: 5'-CGTTGCACGCGTGGTTTGT-3'  | No        |
| <i>GUS</i> -Off-target6   | Chromosome 4B:<br>385,935,844-385,935,860 | <b>ATC</b> TTAAAGCCACGGCCGT <b>CTCT</b>         | F: 5'-TAAGAGCAAAAGAAGGAT-3'<br>R: 5'-TGTGCGGCGAGTGAATG-3'     | No        |
| <i>TaMTL</i> -Off-target1 | TraesCS4B02G011600                        | <b>CCT</b> CGTCCAGCTCCTGCAGCT <b>CC</b>         | F:5'-GGGGATAGAAAAGAAATCAT-3'<br>R:5'-CGCCTGTCCTCGTCCACTCC-3'  | No        |
| <i>TaMTL</i> -Off-target2 | TraesCS4A02G302200                        | <b>CCT</b> CGTCCAGCTCCTGCAGCT <b>GC</b>         | F: 5'-AGAAAAGGAAGGGCTAATC-3'<br>R: 5'-TCTGTGAAGTCGCTGTCAA-3'  | No        |
| <i>TaMTL</i> -Off-target3 | TraesCS4D02G009700                        | <b>CCCT</b> CGTCCAGCTCCTGCAGCT <b>G</b>         | F: 5'-GGATATATAGAAAAGGAAG-3'<br>R: 5'-GCCAGTGGAGTAAATGAG-3'   | No        |
| <i>TaMTL</i> -Off-target4 | TraesCS1B02G061400                        | <b>CCTT</b> CGTCCAGCTCCTGCAGCT <b>G</b>         | F: 5'-TAGAAAAGGAAGGGCTAA-3'<br>R: 5'-CTCCTGTCCTCGTCCACT-3'    | No        |
| <i>TaMTL</i> -Off-target5 | TraesCS6B02G346800                        | <b>CA</b> CGTCCAGCTCCTGCAGC <b>A</b> <b>GGG</b> | F: 5'-AGCGGGGTGGCGCGGATCT-3'<br>R: 5'-GCGAGCACACGCCAACCT-3'   | No        |
| <i>TaMTL</i> -Off-target6 | Chromosome 6D:                            | <b>TC</b> <b>ATC</b> GCGATGCGGTCACCG <b>CGG</b> | F: 5'-TCGCCTGCAGCTGCCAT-3'                                    | No        |



|                            |                                           |                      |                               |    |
|----------------------------|-------------------------------------------|----------------------|-------------------------------|----|
|                            | 433,758,923-433,758,941                   |                      | R: 5'-TCGCAGCACCGCCAATGAT-3'  |    |
| <i>TaWaxy</i> -Off-target1 | TraesCS2D02G311500                        | GACGGCCTCGGCGACGTCC  | F: 5'-CCCCGTTGCAACGCAAACA-3'  | No |
|                            | TraesCS2A02G313000                        | CAGG                 | R: 5'-TGGAGCGCAACCCGGCC-3'    |    |
| <i>TaWaxy</i> -Off-target2 | Chromosome 5D:<br>197,024,951-197,024,968 | CAGGGCCTCGGCGACGTCCT | F: 5'-TCCTAGTGAACCCCTAAC-3'   | No |
|                            |                                           | GGG                  | R: 5'-CCACTTTAAGTTTGACGGT-3'  |    |
| <i>TaWaxy</i> -Off-target3 | Chromosome 3D:<br>123,964,171-123,964,188 | CCGGGCGGCCTCGGCGACGT | F: 5'-GTACTGTTGATGAAGATGA-3'  | No |
|                            |                                           | GGC                  | R: 5'-AACCTTTTTGCCGAACCTGG-3' |    |
| <i>TaWaxy</i> -Off-target4 | Chromosome 2D:<br>307,826,867-307,826,884 | CGGTGGCGGCCTCGGCGACG | F: 5'-ACGGCGGGGCGCGCGTT-3'    | No |
|                            |                                           | TGG                  | R: 5'-GATTGGATCGGGGGTAT-3'    |    |

\*The positions mismatching with the preselected targets are shaded in yellow, and the PAM motifs are shaded in green.
